# Supplementary material for: Binding properties of the anti-TB drugs bedaquiline and TBAJ-876 to a mycobacterial F-ATP synthase
Source: PubMed Central journal article supplement (PMC9516385; doi:10.1016/j.crstbi.2022.09.001), 2022-09-09
Supplement: mmc1.pdf [file mmc1.pdf]

## Supplementary Information

### Binding properties of the anti-TB drugs bedaquiline and TBAJ-876 to a mycobacterial F-ATP synthase

Alexander Kraha<sup>1\*</sup>, Gerhard Grüber<sup>1,2</sup> & Peter J. Bond<sup>1,3\*</sup>

<sup>1</sup>Bioinformatics Institute, Agency for Science, Technology and Research (A\*STAR), 30 Biopolis Str., #07-01 Matrix, Singapore 138671

<sup>2</sup>School of Biological Sciences, Nanyang Technological University, 60 Nanyang Drive, Singapore 637551

<sup>3</sup>Department of Biological Sciences, National University of Singapore, 14 Science Drive 4, Singapore 117543

Contact: [kraha@bii.a-star.edu.sg](mailto:kraha@bii.a-star.edu.sg) (AK) / [peterjb@bii.a-star.edu.sg](mailto:peterjb@bii.a-star.edu.sg) (PJB)

**Table S1: Number of heavy-atom contacts between each drug and the protein (cut-off 5 Å).** Average and standard deviations for each system were obtained over the whole triplicate simulation sampling (300 ns).

| <b>a) drug and E65 charged</b> |            |                 |
|--------------------------------|------------|-----------------|
| <b>Number of contacts</b>      |            |                 |
|                                | <b>BDQ</b> | <b>TBAJ-876</b> |
| <b>Lagging</b>                 | 64.4 ± 4.1 | 72.5 ± 4.2      |
| <b>Leading</b>                 | 74.4 ± 5.6 | 81.2 ± 6.4      |
| <b>c-ring</b>                  | 50.7 ± 5.1 | 52.5 ± 4.3      |

| <b>b) drug and E65 neutral</b> |            |                 |
|--------------------------------|------------|-----------------|
| <b>Number of contacts</b>      |            |                 |
|                                | <b>BDQ</b> | <b>TBAJ-876</b> |
| <b>Lagging</b>                 | 60.7 ± 4.3 | 65.5 ± 4.6      |
| <b>Leading</b>                 | 74.6 ± 5.5 | 76.6 ± 10.2     |
| <b>c-ring</b>                  | 44.8 ± 4.5 | 45.7 ± 5.3      |

**Table S2: Minimum distances of protein residues to BDQ and TBAJ-876.** Distances are shown for both drugs bound to each site (leading, lagging and *c*-ring only) when drug and key-glutamate are neutral. Averages and standard deviations were derived from merging all data over all simulated trajectories (300 ns each).

|                                              | BDQ (protonated) |             |           | TBAJ-876 (protonated) |           |           |
|----------------------------------------------|------------------|-------------|-----------|-----------------------|-----------|-----------|
|                                              | <i>c</i> -ring   | Lagging     | Leading   | <i>c</i> -ring        | Lagging   | Leading   |
| A28                                          | 5.8 ± 0.9        | 4.7 ± 0.5   | 5.4 ± 0.5 | 5.7 ± 1.1             | 5.0 ± 0.5 | 5.1 ± 0.6 |
| V61                                          | 5.2 ± 0.7        | 5.7 ± 0.5   | 5.4 ± 0.5 | 5.4 ± 0.7             | 5.2 ± 0.5 | 5.6 ± 0.5 |
| G62                                          | 4.4 ± 0.4        | 4.5 ± 0.4   | 4.4 ± 0.3 | 4.4 ± 0.4             | 4.2 ± 0.3 | 4.4 ± 0.4 |
| L63                                          | 4.3 ± 0.6        | 4.6 ± 0.5   | 4.3 ± 0.5 | 4.4 ± 0.6             | 4.5 ± 0.5 | 4.4 ± 0.6 |
| E65                                          | 3.6 ± 0.2        | 3.6 ± 0.2   | 3.6 ± 0.2 | 3.6 ± 0.3             | 3.6 ± 0.2 | 3.6 ± 0.3 |
| A66                                          | 3.6 ± 0.2        | 3.6 ± 0.2   | 3.6 ± 0.2 | 3.6 ± 0.3             | 3.6 ± 0.2 | 3.6 ± 0.2 |
| A67                                          | 4.4 ± 1.0        | 3.8 ± 0.2   | 3.8 ± 0.2 | 4.2 ± 1.1             | 3.8 ± 0.2 | 3.9 ± 0.3 |
| Y68                                          | 3.7 ± 0.3        | 3.6 ± 0.2   | 3.8 ± 0.3 | 4.0 ± 1.0             | 3.6 ± 0.2 | 3.7 ± 0.2 |
| F69                                          | 3.5 ± 0.2        | 3.6 ± 0.2   | 3.6 ± 0.2 | 3.5 ± 0.1             | 3.4 ± 0.2 | 3.4 ± 0.2 |
| I70                                          | 3.7 ± 0.3        | 3.7 ± 0.2   | 3.6 ± 0.2 | 3.8 ± 0.2             | 3.7 ± 0.2 | 3.6 ± 0.2 |
| L72                                          | 4.6 ± 1.1        | 3.8 ± 0.3   | 4.5 ± 0.6 | 4.6 ± 1.7             | 3.8 ± 0.4 | 3.8 ± 0.6 |
| F74                                          | 6.8 ± 1.2        | 5.0 ± 0.8   | 7.2 ± 1.2 | 6.2 ± 2.3             | 4.3 ± 0.7 | 4.9 ± 1.1 |
| <b>E65:Oε2 -<br/>LIG:N<sup>neutral</sup></b> | 3.5 ± 1.3        | 2.8 ± 0.1   | 2.8 ± 0.2 | 3.2 ± 0.2             | 2.8 ± 0.1 | 2.8 ± 0.2 |
| F169                                         | N/A              | 5.17 ± 1.14 | N/A       | N/A                   | 4.5 ± 0.8 | N/A       |
| L170                                         | N/A              | 4.41 ± 0.54 | N/A       | N/A                   | 4.0 ± 0.4 | N/A       |
| P172                                         | N/A              | 3.98 ± 0.31 | N/A       | N/A                   | 3.6 ± 0.3 | N/A       |
| I173                                         | N/A              | 3.62 ± 0.18 | N/A       | N/A                   | 3.6 ± 0.2 | N/A       |
| V176                                         | N/A              | 3.68 ± 0.29 | N/A       | N/A                   | 3.8 ± 0.3 | N/A       |
| L199                                         | N/A              | N/A         | 5.7 ± 0.7 | N/A                   | N/A       | 6.3 ± 2.0 |
| F206                                         | N/A              | N/A         | 8.3 ± 1.2 | N/A                   | N/A       | 5.6 ± 2.4 |
| F213                                         | N/A              | N/A         | 3.8 ± 0.3 | N/A                   | N/A       | 3.9 ± 0.5 |
| P214                                         | N/A              | N/A         | 4.8 ± 0.7 | N/A                   | N/A       | 4.6 ± 1.2 |
| V217                                         | N/A              | N/A         | 3.7 ± 0.3 | N/A                   | N/A       | 4.2 ± 0.8 |
| W218                                         | N/A              | N/A         | 2.3 ± 0.5 | N/A                   | N/A       | 3.6 ± 1.9 |
| F221                                         | N/A              | N/A         | 2.9 ± 0.4 | N/A                   | N/A       | 2.6 ± 0.6 |

**Table S3: Block analysis of the minimum distances for both drugs.** The minimum distances for windows of 10 – 70 ns, 40 – 70 ns and 70 – 100 ns are shown for all three sites. In a) and b) the BDQ bound state is shown in its charged and neutral state, respectively. In c) and d) the minimum distances for the TBAJ-876 bound state are shown when drug and key-glutamate are charged or neutral, respectively.

| a) BDQ<br>(deprotonated) | c-ring    |           |           | Lagging   |           |           | Leading   |           |           |
|--------------------------|-----------|-----------|-----------|-----------|-----------|-----------|-----------|-----------|-----------|
|                          | 10-40 ns  | 40-70 ns  | 70-100 ns | 10-40 ns  | 40-70 ns  | 70-100 ns | 10-40 ns  | 40-70 ns  | 70-100 ns |
| cA28                     | 4.9 ± 0.6 | 4.8 ± 0.6 | 4.7 ± 0.6 | 4.9 ± 0.6 | 4.8 ± 0.5 | 4.8 ± 0.6 | 5.4 ± 0.6 | 5.2 ± 0.7 | 5.6 ± 0.8 |
| cV61                     | 4.2 ± 0.3 | 4.2 ± 0.4 | 4.1 ± 0.5 | 5.0 ± 0.5 | 5.4 ± 0.7 | 5.5 ± 0.7 | 4.8 ± 0.6 | 5.3 ± 0.8 | 5.5 ± 1.0 |
| cG62                     | 4.0 ± 0.4 | 4.0 ± 0.4 | 3.9 ± 0.3 | 4.2 ± 0.3 | 4.4 ± 0.4 | 4.5 ± 0.5 | 4.4 ± 0.3 | 4.4 ± 0.4 | 4.6 ± 0.6 |
| cL63                     | 3.5 ± 0.1 | 3.5 ± 0.1 | 3.5 ± 0.1 | 4.2 ± 0.3 | 4.3 ± 0.4 | 4.8 ± 0.7 | 4.0 ± 0.3 | 4.2 ± 0.4 | 4.4 ± 0.8 |
| cE65                     | 3.6 ± 0.2 | 3.6 ± 0.2 | 3.6 ± 0.3 | 3.5 ± 0.1 | 3.5 ± 0.1 | 3.6 ± 0.2 | 3.5 ± 0.1 | 3.5 ± 0.1 | 3.6 ± 0.2 |
| cA66                     | 3.8 ± 0.2 | 3.8 ± 0.2 | 3.8 ± 0.2 | 3.6 ± 0.2 | 3.6 ± 0.2 | 3.6 ± 0.3 | 3.6 ± 0.2 | 3.6 ± 0.2 | 3.6 ± 0.2 |
| cA67                     | 3.8 ± 0.2 | 3.8 ± 0.2 | 3.8 ± 0.2 | 3.7 ± 0.3 | 3.7 ± 0.2 | 3.8 ± 0.2 | 3.8 ± 0.2 | 3.9 ± 0.3 | 4.2 ± 0.4 |
| cY68                     | 3.6 ± 0.2 | 3.6 ± 0.2 | 3.6 ± 0.2 | 3.7 ± 0.1 | 3.7 ± 0.2 | 3.7 ± 0.2 | 3.8 ± 0.2 | 3.8 ± 0.2 | 3.7 ± 0.2 |
| cF69                     | 3.7 ± 0.3 | 3.7 ± 0.3 | 3.7 ± 0.3 | 3.6 ± 0.2 | 3.6 ± 0.2 | 3.6 ± 0.2 | 3.6 ± 0.2 | 3.6 ± 0.2 | 3.6 ± 0.2 |
| cI70                     | 5.0 ± 1.2 | 5.1 ± 1.3 | 5.2 ± 1.4 | 3.6 ± 0.2 | 3.6 ± 0.2 | 3.6 ± 0.2 | 3.6 ± 0.2 | 3.6 ± 0.2 | 3.9 ± 0.5 |
| cL72                     | 7.1 ± 1.2 | 7.1 ± 1.2 | 7.1 ± 1.3 | 3.9 ± 0.3 | 3.8 ± 0.3 | 3.6 ± 0.2 | 4.7 ± 0.7 | 4.5 ± 0.7 | 5.1 ± 1.5 |
| cF74                     | 2.7 ± 0.1 | 2.7 ± 0.1 | 2.7 ± 0.1 | 5.5 ± 0.6 | 5.0 ± 0.7 | 5.0 ± 0.7 | 7.1 ± 0.8 | 6.9 ± 0.9 | 7.1 ± 1.5 |
| cE65:Oex-LIG:N           | 4.9 ± 0.6 | 4.8 ± 0.6 | 4.7 ± 0.6 | 2.7 ± 0.1 | 2.7 ± 0.1 | 2.7 ± 0.1 | 2.7 ± 0.1 | 2.7 ± 0.1 | 2.8 ± 0.1 |
| aF169                    | N/A       | N/A       | N/A       | 5.9 ± 1.5 | 5.6 ± 1.4 | 5.1 ± 1.4 | N/A       | N/A       | N/A       |
| aL170                    | N/A       | N/A       | N/A       | 4.3 ± 0.5 | 4.3 ± 0.5 | 4.5 ± 0.6 | N/A       | N/A       | N/A       |
| aP172                    | N/A       | N/A       | N/A       | 3.9 ± 0.3 | 3.9 ± 0.3 | 3.9 ± 0.3 | N/A       | N/A       | N/A       |
| aI173                    | N/A       | N/A       | N/A       | 3.7 ± 0.2 | 3.6 ± 0.2 | 3.7 ± 0.2 | N/A       | N/A       | N/A       |
| aV176                    | N/A       | N/A       | N/A       | 3.8 ± 0.3 | 3.8 ± 0.3 | 3.7 ± 0.3 | N/A       | N/A       | N/A       |
| aL199                    | N/A       | N/A       | N/A       | N/A       | N/A       | N/A       | 4.9 ± 0.8 | 5.4 ± 0.9 | 5.8 ± 1.1 |
| aF213                    | N/A       | N/A       | N/A       | N/A       | N/A       | N/A       | 4.0 ± 0.4 | 4.1 ± 0.5 | 4.1 ± 0.6 |
| aP214                    | N/A       | N/A       | N/A       | N/A       | N/A       | N/A       | 5.4 ± 0.6 | 5.2 ± 0.7 | 6.0 ± 1.2 |
| aV217                    | N/A       | N/A       | N/A       | N/A       | N/A       | N/A       | 3.8 ± 0.3 | 3.8 ± 0.3 | 3.9 ± 0.3 |
| aW218                    | N/A       | N/A       | N/A       | N/A       | N/A       | N/A       | 2.1 ± 0.3 | 2.2 ± 0.5 | 2.4 ± 0.5 |
| aF221                    | N/A       | N/A       | N/A       | N/A       | N/A       | N/A       | 3.2 ± 0.4 | 3.3 ± 0.4 | 3.5 ± 0.5 |

| b) BDQ<br>(protonated)      | c-ring    |           |           | Lagging   |           |           | Leading   |           |           |
|-----------------------------|-----------|-----------|-----------|-----------|-----------|-----------|-----------|-----------|-----------|
|                             | 10-40 ns  | 40-70 ns  | 70-100 ns | 10-40 ns  | 40-70 ns  | 70-100 ns | 10-40 ns  | 40-70 ns  | 70-100 ns |
| cA28                        | 5.7 ± 0.8 | 6.0 ± 0.9 | 6.0 ± 0.9 | 4.6 ± 0.5 | 4.8 ± 0.5 | 4.9 ± 0.5 | 5.4 ± 0.5 | 5.4 ± 0.5 | 5.5 ± 0.5 |
| cV61                        | 5.4 ± 0.7 | 5.1 ± 0.8 | 5.1 ± 0.8 | 5.7 ± 0.5 | 5.6 ± 0.5 | 5.8 ± 0.5 | 5.4 ± 0.5 | 5.4 ± 0.5 | 5.3 ± 0.5 |
| cG62                        | 4.4 ± 0.4 | 4.3 ± 0.4 | 4.3 ± 0.4 | 4.5 ± 0.4 | 4.4 ± 0.3 | 4.5 ± 0.4 | 4.4 ± 0.3 | 4.4 ± 0.3 | 4.4 ± 0.3 |
| cL63                        | 4.3 ± 0.5 | 4.4 ± 0.7 | 4.4 ± 0.7 | 4.5 ± 0.5 | 4.6 ± 0.6 | 4.6 ± 0.6 | 4.2 ± 0.4 | 4.3 ± 0.4 | 4.3 ± 0.5 |
| cE65                        | 3.6 ± 0.2 | 3.6 ± 0.2 | 3.6 ± 0.2 | 3.6 ± 0.2 | 3.6 ± 0.2 | 3.6 ± 0.2 | 3.6 ± 0.2 | 3.6 ± 0.2 | 3.6 ± 0.2 |
| cA66                        | 3.6 ± 0.2 | 3.6 ± 0.2 | 3.6 ± 0.2 | 3.6 ± 0.2 | 3.6 ± 0.2 | 3.6 ± 0.2 | 3.6 ± 0.2 | 3.6 ± 0.2 | 3.6 ± 0.2 |
| cA67                        | 4.1 ± 0.8 | 4.6 ± 1.2 | 4.6 ± 1.2 | 3.8 ± 0.2 | 3.8 ± 0.2 | 3.8 ± 0.2 | 3.9 ± 0.3 | 3.9 ± 0.2 | 3.8 ± 0.3 |
| cY68                        | 3.8 ± 0.3 | 3.7 ± 0.3 | 3.7 ± 0.3 | 3.6 ± 0.2 | 3.7 ± 0.2 | 3.7 ± 0.2 | 3.7 ± 0.3 | 3.8 ± 0.3 | 3.8 ± 0.3 |
| cF69                        | 3.5 ± 0.2 | 3.5 ± 0.2 | 3.5 ± 0.2 | 3.6 ± 0.2 | 3.6 ± 0.2 | 3.6 ± 0.2 | 3.6 ± 0.2 | 3.6 ± 0.2 | 3.5 ± 0.2 |
| cI70                        | 3.6 ± 0.3 | 3.7 ± 0.3 | 3.7 ± 0.3 | 3.7 ± 0.2 | 3.7 ± 0.2 | 3.7 ± 0.2 | 3.6 ± 0.2 | 3.6 ± 0.2 | 3.7 ± 0.2 |
| cL72                        | 4.5 ± 1.0 | 4.7 ± 1.2 | 4.7 ± 1.2 | 3.8 ± 0.2 | 3.8 ± 0.3 | 3.9 ± 0.3 | 4.5 ± 0.6 | 4.4 ± 0.6 | 4.6 ± 0.7 |
| cF74                        | 6.4 ± 1.1 | 7.1 ± 1.2 | 7.1 ± 1.2 | 4.9 ± 0.8 | 4.9 ± 0.8 | 5.2 ± 0.8 | 6.9 ± 1.0 | 7.4 ± 1.1 | 7.8 ± 1.3 |
| cE65:O <sub>Ex</sub> -LIG:N | 3.2 ± 1.0 | 3.8 ± 1.5 | 3.9 ± 1.6 | 2.8 ± 0.1 | 2.8 ± 0.1 | 2.8 ± 0.1 | 2.8 ± 0.1 | 2.9 ± 0.4 | 2.8 ± 0.1 |
| αF169                       | N/A       | N/A       | N/A       | 5.6 ± 1.2 | 5.5 ± 1.2 | 4.3 ± 0.6 | N/A       | N/A       | N/A       |
| αL170                       | N/A       | N/A       | N/A       | 4.3 ± 0.5 | 4.5 ± 0.5 | 4.5 ± 0.6 | N/A       | N/A       | N/A       |
| αP172                       | N/A       | N/A       | N/A       | 3.9 ± 0.3 | 4.0 ± 0.3 | 4.1 ± 0.3 | N/A       | N/A       | N/A       |
| αI173                       | N/A       | N/A       | N/A       | 3.6 ± 0.2 | 3.6 ± 0.2 | 3.7 ± 0.2 | N/A       | N/A       | N/A       |
| αV176                       | N/A       | N/A       | N/A       | 3.8 ± 0.3 | 3.7 ± 0.3 | 3.6 ± 0.3 | N/A       | N/A       | N/A       |
| αL199                       | N/A       | N/A       | N/A       | N/A       | N/A       | N/A       | 5.6 ± 0.7 | 5.9 ± 0.8 | 5.7 ± 0.7 |
| αF213                       | N/A       | N/A       | N/A       | N/A       | N/A       | N/A       | 3.8 ± 0.3 | 3.7 ± 0.3 | 3.8 ± 0.4 |
| αP214                       | N/A       | N/A       | N/A       | N/A       | N/A       | N/A       | 4.6 ± 0.5 | 4.8 ± 0.6 | 5.0 ± 0.9 |
| αV217                       | N/A       | N/A       | N/A       | N/A       | N/A       | N/A       | 3.7 ± 0.3 | 3.6 ± 0.3 | 3.6 ± 0.2 |
| αW218                       | N/A       | N/A       | N/A       | N/A       | N/A       | N/A       | 2.3 ± 0.4 | 2.4 ± 0.6 | 2.3 ± 0.4 |
| αF221                       | N/A       | N/A       | N/A       | N/A       | N/A       | N/A       | 2.9 ± 0.4 | 2.9 ± 0.4 | 2.9 ± 0.4 |

| c) TBAJ-876<br>(deprotonated) | c-ring    |           |           | Lagging   |           |           | Leading   |           |           |
|-------------------------------|-----------|-----------|-----------|-----------|-----------|-----------|-----------|-----------|-----------|
|                               | 10-40 ns  | 40-70 ns  | 70-100 ns | 10-40 ns  | 40-70 ns  | 70-100 ns | 10-40 ns  | 40-70 ns  | 70-100 ns |
| cA28                          | 5.0 ± 0.5 | 5.0 ± 0.5 | 5.0 ± 0.5 | 5.0 ± 0.5 | 5.0 ± 0.5 | 5.0 ± 0.5 | 5.2 ± 0.6 | 5.0 ± 0.7 | 5.5 ± 0.6 |
| cV61                          | 5.0 ± 0.5 | 4.9 ± 0.6 | 4.8 ± 0.6 | 4.5 ± 0.5 | 4.6 ± 0.5 | 4.7 ± 0.5 | 5.0 ± 0.8 | 5.2 ± 1.0 | 5.1 ± 0.9 |
| cG62                          | 4.1 ± 0.3 | 4.1 ± 0.3 | 4.1 ± 0.4 | 4.0 ± 0.2 | 4.1 ± 0.2 | 4.1 ± 0.3 | 4.4 ± 0.3 | 4.6 ± 0.4 | 4.5 ± 0.4 |
| cL63                          | 4.0 ± 0.3 | 4.0 ± 0.3 | 4.0 ± 0.3 | 4.0 ± 0.3 | 4.0 ± 0.3 | 4.0 ± 0.3 | 4.3 ± 0.8 | 4.5 ± 0.9 | 4.5 ± 0.9 |
| cE65                          | 3.5 ± 0.1 | 3.5 ± 0.1 | 3.5 ± 0.1 | 3.5 ± 0.1 | 3.5 ± 0.1 | 3.5 ± 0.1 | 3.5 ± 0.2 | 3.5 ± 0.2 | 3.5 ± 0.2 |
| cA66                          | 3.6 ± 0.2 | 3.6 ± 0.2 | 3.6 ± 0.2 | 3.6 ± 0.2 | 3.6 ± 0.2 | 3.6 ± 0.2 | 3.6 ± 0.2 | 3.6 ± 0.2 | 3.6 ± 0.2 |
| cA67                          | 3.8 ± 0.2 | 3.9 ± 0.3 | 3.9 ± 0.3 | 3.6 ± 0.2 | 3.6 ± 0.2 | 3.7 ± 0.2 | 3.9 ± 0.3 | 4.0 ± 0.3 | 3.9 ± 0.3 |
| cY68                          | 3.8 ± 0.2 | 3.8 ± 0.2 | 3.8 ± 0.2 | 3.8 ± 0.2 | 3.8 ± 0.2 | 3.8 ± 0.2 | 3.8 ± 0.2 | 3.8 ± 0.3 | 3.8 ± 0.3 |
| cF69                          | 3.4 ± 0.2 | 3.4 ± 0.2 | 3.4 ± 0.2 | 3.4 ± 0.2 | 3.4 ± 0.2 | 3.4 ± 0.2 | 3.5 ± 0.2 | 3.4 ± 0.2 | 3.4 ± 0.2 |
| cI70                          | 3.6 ± 0.2 | 3.6 ± 0.2 | 3.6 ± 0.2 | 3.6 ± 0.2 | 3.6 ± 0.2 | 3.7 ± 0.3 | 3.6 ± 0.2 | 3.6 ± 0.3 | 3.7 ± 0.3 |
| cL72                          | 3.8 ± 0.7 | 3.8 ± 0.7 | 3.9 ± 0.8 | 3.5 ± 0.3 | 3.5 ± 0.3 | 3.4 ± 0.3 | 4.4 ± 0.9 | 4.5 ± 0.9 | 4.7 ± 0.9 |
| cF74                          | 5.3 ± 1.1 | 5.6 ± 1.2 | 6.0 ± 1.4 | 4.8 ± 0.7 | 5.2 ± 1.2 | 5.4 ± 1.2 | 6.7 ± 1.8 | 7.0 ± 2.2 | 7.0 ± 2.2 |
| cE65:OEx-LIG:N                | 2.7 ± 0.1 | 2.7 ± 0.1 | 2.7 ± 0.1 | 2.7 ± 0.1 | 2.7 ± 0.1 | 2.7 ± 0.1 | 2.7 ± 0.1 | 2.7 ± 0.1 | 2.7 ± 0.1 |
| αF169                         | N/A       | N/A       | N/A       | 4.4 ± 0.8 | 4.9 ± 1.0 | 4.3 ± 0.8 | N/A       | N/A       | N/A       |
| αL170                         | N/A       | N/A       | N/A       | 4.0 ± 0.4 | 4.0 ± 0.4 | 4.1 ± 0.5 | N/A       | N/A       | N/A       |
| αP172                         | N/A       | N/A       | N/A       | 3.5 ± 0.3 | 3.6 ± 0.3 | 3.6 ± 0.3 | N/A       | N/A       | N/A       |
| αI173                         | N/A       | N/A       | N/A       | 3.6 ± 0.2 | 3.5 ± 0.2 | 3.6 ± 0.2 | N/A       | N/A       | N/A       |
| αV176                         | N/A       | N/A       | N/A       | 3.7 ± 0.3 | 3.8 ± 0.3 | 3.8 ± 0.3 | N/A       | N/A       | N/A       |
| αL199                         | N/A       | N/A       | N/A       | N/A       | N/A       | N/A       | 5.2 ± 0.9 | 5.0 ± 1.3 | 4.4 ± 1.4 |
| αF213                         | N/A       | N/A       | N/A       | N/A       | N/A       | N/A       | 3.6 ± 0.3 | 3.7 ± 0.4 | 4.0 ± 0.7 |
| αP214                         | N/A       | N/A       | N/A       | N/A       | N/A       | N/A       | 4.2 ± 0.5 | 4.5 ± 0.7 | 4.3 ± 0.5 |
| αV217                         | N/A       | N/A       | N/A       | N/A       | N/A       | N/A       | 3.8 ± 0.3 | 3.8 ± 0.3 | 3.9 ± 0.5 |
| αW218                         | N/A       | N/A       | N/A       | N/A       | N/A       | N/A       | 2.3 ± 0.4 | 2.4 ± 0.5 | 2.5 ± 0.6 |
| αF221                         | N/A       | N/A       | N/A       | N/A       | N/A       | N/A       | 3.1 ± 0.4 | 3.1 ± 0.5 | 3.2 ± 0.5 |

| d) TBAJ-876<br>(protonated) | c-ring    |           |           | Lagging   |           |           | Leading   |           |           |
|-----------------------------|-----------|-----------|-----------|-----------|-----------|-----------|-----------|-----------|-----------|
|                             | 10-40 ns  | 40-70 ns  | 70-100 ns | 10-40 ns  | 40-70 ns  | 70-100 ns | 10-40 ns  | 40-70 ns  | 70-100 ns |
| cA28                        | 5.1 ± 0.5 | 5.1 ± 0.6 | 5.2 ± 0.7 | 4.9 ± 0.6 | 4.8 ± 0.5 | 4.8 ± 0.6 | 5.2 ± 0.5 | 5.2 ± 0.7 | 5.6 ± 0.8 |
| cV61                        | 4.9 ± 0.6 | 4.8 ± 0.6 | 4.7 ± 0.6 | 5.0 ± 0.5 | 5.4 ± 0.7 | 5.5 ± 0.7 | 5.7 ± 0.5 | 5.3 ± 0.8 | 5.5 ± 1.0 |
| cG62                        | 4.2 ± 0.3 | 4.2 ± 0.4 | 4.1 ± 0.5 | 4.2 ± 0.3 | 4.4 ± 0.4 | 4.5 ± 0.5 | 4.4 ± 0.3 | 4.4 ± 0.4 | 4.6 ± 0.6 |
| cL63                        | 4.0 ± 0.4 | 4.0 ± 0.4 | 3.9 ± 0.3 | 4.2 ± 0.3 | 4.3 ± 0.4 | 4.8 ± 0.7 | 4.4 ± 0.5 | 4.2 ± 0.4 | 4.4 ± 0.8 |
| cE65                        | 3.5 ± 0.1 | 3.5 ± 0.1 | 3.5 ± 0.1 | 3.5 ± 0.1 | 3.5 ± 0.1 | 3.6 ± 0.2 | 3.6 ± 0.2 | 3.5 ± 0.1 | 3.6 ± 0.2 |
| cA66                        | 3.6 ± 0.2 | 3.6 ± 0.2 | 3.6 ± 0.3 | 3.6 ± 0.2 | 3.6 ± 0.2 | 3.6 ± 0.2 | 3.6 ± 0.2 | 3.6 ± 0.2 | 3.6 ± 0.2 |
| cA67                        | 3.8 ± 0.2 | 3.8 ± 0.2 | 3.8 ± 0.2 | 3.7 ± 0.2 | 3.7 ± 0.2 | 3.8 ± 0.2 | 3.9 ± 0.3 | 3.9 ± 0.3 | 4.2 ± 0.4 |
| cY68                        | 3.8 ± 0.2 | 3.8 ± 0.2 | 3.8 ± 0.2 | 3.7 ± 0.2 | 3.7 ± 0.2 | 3.7 ± 0.2 | 3.7 ± 0.2 | 3.8 ± 0.2 | 3.7 ± 0.2 |
| cF69                        | 3.6 ± 0.2 | 3.6 ± 0.2 | 3.6 ± 0.2 | 3.6 ± 0.2 | 3.6 ± 0.2 | 3.6 ± 0.2 | 3.4 ± 0.2 | 3.6 ± 0.2 | 3.6 ± 0.2 |
| cI70                        | 3.7 ± 0.3 | 3.7 ± 0.3 | 3.7 ± 0.3 | 3.6 ± 0.2 | 3.6 ± 0.2 | 3.6 ± 0.2 | 3.5 ± 0.2 | 3.6 ± 0.2 | 3.9 ± 0.5 |
| cL72                        | 5.0 ± 1.2 | 5.1 ± 1.3 | 5.2 ± 1.4 | 3.9 ± 0.3 | 3.8 ± 0.3 | 3.9 ± 0.3 | 3.9 ± 0.6 | 4.5 ± 0.7 | 5.1 ± 1.5 |
| cF74                        | 7.1 ± 1.2 | 7.1 ± 1.2 | 7.1 ± 1.3 | 5.5 ± 0.6 | 5.0 ± 0.7 | 5.0 ± 0.6 | 4.9 ± 1.1 | 6.9 ± 0.8 | 7.1 ± 1.5 |
| cE65:OEx-LIG:N              | 2.7 ± 0.1 | 2.7 ± 0.1 | 2.7 ± 0.1 | 2.7 ± 0.1 | 2.7 ± 0.1 | 2.7 ± 0.1 | 2.8 ± 0.1 | 2.7 ± 0.1 | 2.8 ± 0.1 |
| αF169                       | N/A       | N/A       | N/A       | 3.6 ± 0.2 | 5.6 ± 1.4 | 5.1 ± 1.4 | N/A       | N/A       | N/A       |
| αL170                       | N/A       | N/A       | N/A       | 4.3 ± 0.5 | 4.3 ± 0.5 | 4.5 ± 0.6 | N/A       | N/A       | N/A       |
| αP172                       | N/A       | N/A       | N/A       | 3.9 ± 0.3 | 3.9 ± 0.3 | 3.9 ± 0.3 | N/A       | N/A       | N/A       |
| αI173                       | N/A       | N/A       | N/A       | 3.7 ± 0.2 | 3.6 ± 0.2 | 3.7 ± 0.2 | N/A       | N/A       | N/A       |
| αV176                       | N/A       | N/A       | N/A       | 3.8 ± 0.3 | 3.8 ± 0.3 | 3.7 ± 0.3 | N/A       | N/A       | N/A       |
| αL199                       | N/A       | N/A       | N/A       | N/A       | N/A       | N/A       | 5.1 ± 1.3 | 5.4 ± 0.9 | 5.8 ± 1.1 |
| αF213                       | N/A       | N/A       | N/A       | N/A       | N/A       | N/A       | 3.9 ± 0.5 | 4.1 ± 0.5 | 4.1 ± 0.6 |
| αP214                       | N/A       | N/A       | N/A       | N/A       | N/A       | N/A       | 4.1 ± 0.4 | 5.2 ± 0.7 | 5.9 ± 1.2 |
| αV217                       | N/A       | N/A       | N/A       | N/A       | N/A       | N/A       | 4.3 ± 0.7 | 3.8 ± 0.3 | 3.8 ± 0.3 |
| αW218                       | N/A       | N/A       | N/A       | N/A       | N/A       | N/A       | 2.9 ± 1.1 | 2.2 ± 0.5 | 2.4 ± 0.5 |
| αF221                       | N/A       | N/A       | N/A       | N/A       | N/A       | N/A       | 2.9 ± 0.5 | 3.3 ± 0.4 | 3.5 ± 0.5 |

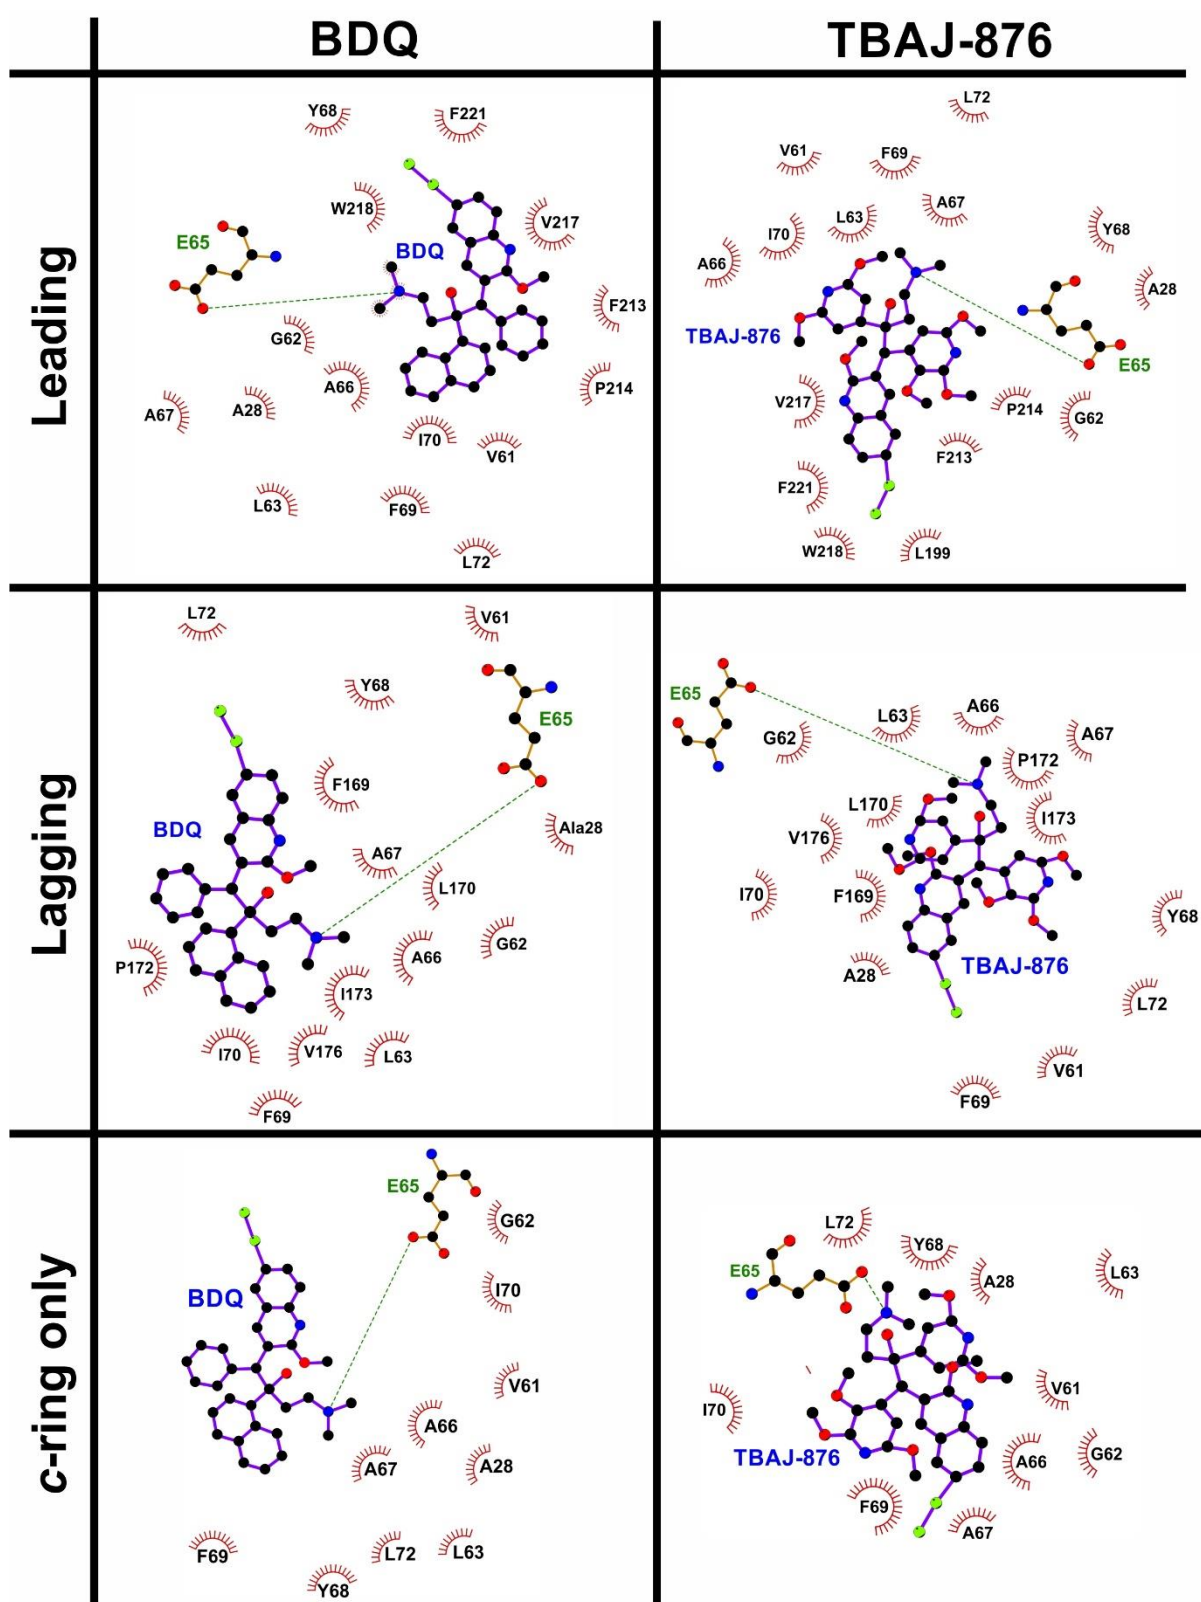

**Figure S1: Protein drug interactions.** LigPlot+ representations of protein-drug interactions for both drugs bound, when E65 and the drugs are charged, to all three sites. Carbon, nitrogen, oxygen and bromine (also lone pair) atoms of the drug are shown in *black, blue, red* and *green*, respectively.
